# Supplementary material for: The Relationship between Knowledge, Dietary Supplementation, and Sleep Quality in Young Adults after the COVID-19 Pandemic
Source: MDPI journal article supplement (doi:10.3390/nu15153354), 2023-07-28
Supplement: s1 [file s1]

**Author's questionnaire concerning dietary components,  
supplementation and pharmacotherapy**

The last part of the survey is about your knowledge of the effect of nutrition on sleep, and the use of sleep supplementation/pharmacotherapy. When answering these questions, please answer according to your state of knowledge. If you are unsure, do not guess. Consider supplements you have been using regularly for a minimum of one month.

1. How many hours before bedtime should the last meal be consumed?
  - a) Less than one hour
  - b) 1-3 hours
  - c) More than 3 hours
  - d) I don't know
2. Does alcohol improve sleep quality?
  - a) Yes, because it helps you fall asleep
  - b) No, because it disturbs shallow sleep
  - c) No, because it disturbs deep sleep
  - d) I don't know
3. Does beetroot juice improve sleep quality?
  - a) Yes, because it reduces physiological fatigue
  - b) Yes, because it helps you fall asleep
  - c) Does not affect the quality of sleep
  - d) I don't know
4. How much kiwi should you eat before bed to improve its quality?
  - a) 1 kiwi 2 hours before going to bed
  - b) 2 kiwis an hour before going to bed
  - c) kiwis a day
  - d) I don't know
5. Does drinking 1 cup of warm milk before bed help you fall asleep?
  - a) Yes, because it has the right temperature
  - b) Yes, because it is enough
  - c) No, because it's too small
  - d) I don't know
6. Does eating cherries before bed affect sleep quality?
  - a) Yes
  - b) No
  - c) I don't know
7. How many hours before bedtime can you drink coffee so it does not disturb sleep quality?
  - a) 3 - 4h
  - b) 6 - 8h
  - c) It does not matter
  - d) I don't know
8. Which meal would you choose as the last meal before bedtime?
  - a) Pasta salad with chicken in sweet and sour sauce
  - b) Toast with avocado, egg and bacon
  - c) Sandwiches with lean ham and spicy ketchup
  - d) Salad with egg and tuna
  - e) I don't know
9. Tick the supplements that affect the quality of sleep that you use (minimum one month):
  - I don't use supplements
  - Chamomile
  - Ashwagandha
  - L - ornithine
  - Omega - 3
  - Magnesium
  - Lavender
  - GABA

- CBD oil
  - L - theanine
  - melatonin
  - 5 - HPP
  - Baikal skullcap (skullcap)
  - Multicomponent preparations
- Others:

10. Do you take prescription sleeping pills (e.g. Stilnox, Imovane, Zolpic, Nasen, Morfeo, Dobroson, and others)?
  - a) Yes
  - b) No
11. How often and for how long do you use a sleeping pill? (Question addressed to people who take these drugs, other people, please go to the next question).
  - a) Every day for more than 4 weeks
  - b) Daily, less than 4 weeks
  - c) Only if necessary, ad hoc, longer than 4 weeks
  - d) Only if necessary, ad hoc, shorter than 4 weeks
12. Have you started using supplements/sedatives during the pandemic?
  - a) Yes
  - b) No
13. Do you take other psychotropic drugs?
  - a) Yes
  - b) No
